# Supplementary material for: Early stages of aggregation of engineered α-synuclein monomers and oligomers in solution
Source: PubMed Central journal article supplement (PMC6370846; doi:10.1038/s41598-018-37584-6), 2019-02-11
Supplement: 41598_2018_37584_MOESM1_ESM.pdf [file 41598_2018_37584_MOESM1_ESM.pdf]

# Supplementary information:

## Early stages of aggregation of engineered $\alpha$ -synuclein monomers and oligomers in solution

Xi Li, Chunhua Dong, Marion Hoffmann, Craig R. Garen, Leonardo M. Cortez, Nils O. Petersen, and Michael T. Woodside

### Supplementary figures and tables

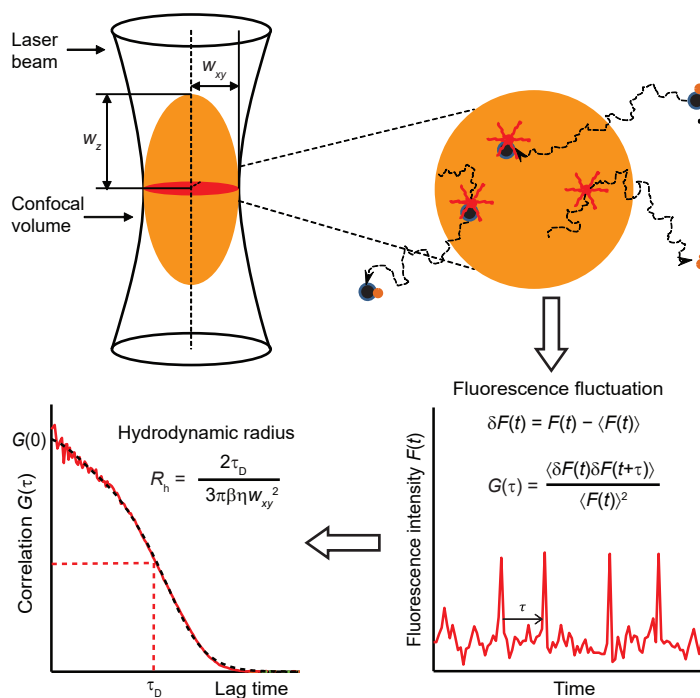

**Figure S1: FCS assay.** Schematic representation of the measurement and analysis of FCS data. Protein molecules labelled with a single dye passing through the confocal volume emit bursts of fluorescence. The decay time of the autocorrelation of the fluorescence intensity yields the hydrodynamic radius.

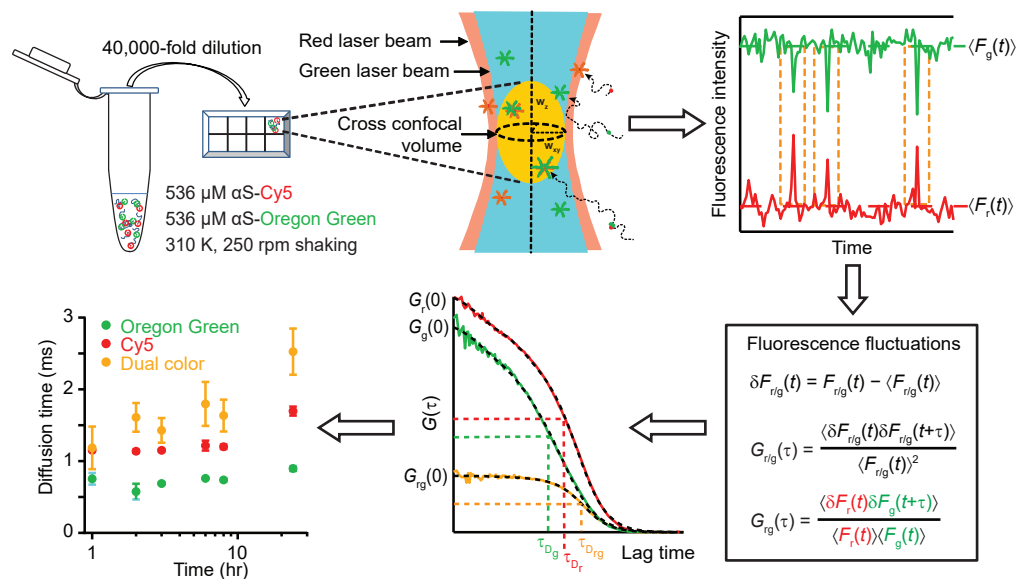

**Figure S2: FCS/FCCS assay.** Schematic representation of the measurement and analysis of FCCS data. Proteins labelled with Cy5 were incubated with other proteins labelled with Oregon green in microfuge tubes. At specific time-points, a sample was diluted for measurement. Assemblies containing red-labelled, green-labelled, or dual-labelled proteins that passed through the overlapping confocal volume (yellow) generated fluorescence fluctuations. The two auto-correlations and the cross-correlation were analyzed to determine diffusion times.

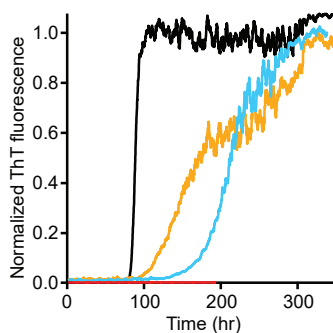

**Figure S3: ThT fluorescence assay of aggregation performed in a microplate.** Fluorescence from monomers (black), dimers (orange), tetramers (cyan), and octamers (red).

**Table S1:** The diffusion time of labeled  $\alpha$ S is independent of protein auto-fluorescence.

| Concentration of green- labelled $\alpha$ S-4 (nM) | Concentration of unlabelled $\alpha$ S-4 (nM) | G(0)              | $\tau_D$ ( $\mu$ s) |
|----------------------------------------------------|-----------------------------------------------|-------------------|---------------------|
| 34                                                 | 10898                                         | 0.100 $\pm$ 0.002 | 464 $\pm$ 25        |
| 34                                                 | 5449                                          | 0.099 $\pm$ 0.002 | 459 $\pm$ 21        |
| 34                                                 | 2724                                          | 0.104 $\pm$ 0.002 | 440 $\pm$ 32        |
| 34                                                 | 1362                                          | 0.092 $\pm$ 0.002 | 450 $\pm$ 28        |
| 34                                                 | 681                                           | 0.133 $\pm$ 0.003 | 473 $\pm$ 34        |
| 34                                                 | 341                                           | 0.104 $\pm$ 0.002 | 456 $\pm$ 28        |
| 34                                                 | 170                                           | 0.151 $\pm$ 0.003 | 460 $\pm$ 27        |
| 34                                                 | 85                                            | 0.129 $\pm$ 0.004 | 476 $\pm$ 37        |

**Table S2:** Dual-colour FCCS experiment codes.

| Cy-5 labelled $\alpha$ -synuclein | Oregon-green labelled $\alpha$ -synuclein                 |                                                           |                                                           |                                                           |
|-----------------------------------|-----------------------------------------------------------|-----------------------------------------------------------|-----------------------------------------------------------|-----------------------------------------------------------|
|                                   | $\alpha$ S-1<br>(536 $\mu$ M)                             | $\alpha$ S-2<br>(268 $\mu$ M)                             | $\alpha$ S-4<br>(134 $\mu$ M)                             | $\alpha$ S-8<br>(67 $\mu$ M)                              |
| $\alpha$ S-1<br>(536 $\mu$ M)     | ( $\alpha$ S-1) <sub>r</sub> ( $\alpha$ S-1) <sub>g</sub> | ( $\alpha$ S-1) <sub>r</sub> ( $\alpha$ S-2) <sub>g</sub> | ( $\alpha$ S-1) <sub>r</sub> ( $\alpha$ S-4) <sub>g</sub> | ( $\alpha$ S-1) <sub>r</sub> ( $\alpha$ S-8) <sub>g</sub> |
| $\alpha$ S-2<br>(268 $\mu$ M)     | ( $\alpha$ S-2) <sub>r</sub> ( $\alpha$ S-1) <sub>g</sub> | ( $\alpha$ S-2) <sub>r</sub> ( $\alpha$ S-2) <sub>g</sub> | -                                                         | -                                                         |
| $\alpha$ S-4<br>(134 $\mu$ M)     | ( $\alpha$ S-4) <sub>r</sub> ( $\alpha$ S-1) <sub>g</sub> | -                                                         | ( $\alpha$ S-4) <sub>r</sub> ( $\alpha$ S-4) <sub>g</sub> | -                                                         |
| $\alpha$ S-8<br>(67 $\mu$ M)      | ( $\alpha$ S-8) <sub>r</sub> ( $\alpha$ S-1) <sub>g</sub> | -                                                         | -                                                         | ( $\alpha$ S-8) <sub>r</sub> ( $\alpha$ S-8) <sub>g</sub> |
